# Supplementary material
Source: publisher site journal article supplement (http://www.kjim.org/upload/media/kjim-2022-198_suppl2.pdf)
Supplement: Supplementary file 1 [file kjim-2022-198_suppl2.pdf]

**Supplementary Table 2. The prevalence of high-risk OSA for measures of hypertension, diabetes, and obesity, according to decile group**

| Decile | Prevalence of high-risk OSA according to decile group |     |      |     |      |     |       |     |      |     |      |     |
|--------|-------------------------------------------------------|-----|------|-----|------|-----|-------|-----|------|-----|------|-----|
|        | SBP                                                   |     | DBP  |     | FPG  |     | HbA1c |     | BMI  |     | WC   |     |
|        | %                                                     | SE  | %    | SE  | %    | SE  | %     | SE  | %    | SE  | %    | SE  |
| 1      | 4.2                                                   | 1.0 | 7.7  | 1.1 | 6.8  | 1.2 | 7.1   | 1.2 | 1.3  | 0.4 | 1.7  | 0.6 |
| 2      | 7.2                                                   | 1.0 | 6.8  | 1.0 | 5.1  | 0.8 | 5.4   | 0.8 | 2.9  | 0.8 | 5.1  | 1.0 |
| 3      | 7.5                                                   | 1.2 | 6.8  | 1.0 | 7.0  | 1.0 | 9.3   | 1.3 | 4.8  | 0.9 | 9.8  | 1.2 |
| 4      | 9.8                                                   | 1.3 | 9.2  | 1.3 | 11.8 | 1.8 | 13.9  | 1.6 | 7.5  | 1.2 | 9.9  | 1.3 |
| 5      | 13.8                                                  | 1.5 | 11.3 | 1.6 | 12.2 | 1.4 | 10.3  | 1.3 | 12.4 | 1.5 | 9.9  | 1.2 |
| 6      | 17.2                                                  | 1.8 | 12.1 | 1.3 | 13.5 | 1.6 | 12.7  | 1.5 | 10.2 | 1.2 | 12.8 | 1.4 |
| 7      | 14.7                                                  | 1.5 | 11.5 | 1.4 | 13.8 | 1.5 | 14.0  | 1.8 | 18.3 | 1.6 | 12.2 | 1.3 |
| 8      | 18.9                                                  | 1.8 | 14.7 | 1.4 | 16.1 | 1.7 | 16.3  | 1.3 | 12.6 | 1.5 | 13.9 | 1.6 |
| 9      | 22.0                                                  | 1.7 | 15.8 | 1.6 | 20.8 | 1.8 | 21.7  | 2.1 | 22.4 | 2.0 | 20.4 | 1.9 |
| 10     | 19.0                                                  | 1.6 | 30.9 | 1.9 | 25.7 | 1.9 | 24.4  | 1.8 | 35.8 | 2.2 | 37.2 | 2.1 |

OSA, obstructive sleep apnea; SBP, systolic blood pressure; DBP, diastolic blood pressure; FPG, fasting plasma glucose; HbA1c, glycosylated hemoglobin; BMI, body mass index; WC, waist circumference; SE, standard error.
